# Supplementary material for: Concept and Design of Martian Far-IR ORE Spectrometer (MIRORES)
Source: MDPI journal article supplement (doi:10.3390/rs14122799), 2022-06-10
Supplement: s1 [file s1]

```

pro martian_farIR_transmittance

;Martian atmosphere composition
Carbon_dioxide_amount=0.95
Nitrogen_amount=0.028
Argon_amount=0.02
Oxygen_amount=0.00174
Carbon_monoxide_amount=0.00747

Carbon_dioxide_molar_mass=44.009 ;g·mol-1
Nitrogen_molar_mass=28.014 ;g/mol
Argon_molar_mass=39.9 ; g/mol
Oxygen_molar_mass=31.999 ; g/mol
Carbon_monoxide_molar_mass=28.010 ;g/mol
Water_Molar_mass=18.01528d ; g/mol

Mole = 6.02214076d * 1e23 ; Avogadro number

; average molar mass of Martian atmosphere
average_molar_mass = Carbon_dioxide_amount*Carbon_dioxide_molar_mass
average_molar_mass+= Nitrogen_amount*Nitrogen_molar_mass
average_molar_mass+= Argon_amount*Argon_molar_mass
average_molar_mass+= Oxygen_amount*Oxygen_molar_mass
average_molar_mass+= Carbon_monoxide_amount*Carbon_monoxide_molar_mass

h=0.d ; starting hight of the simulation (km)
h_step=0.1 ; step in the simulation (km)
h_max=80.0 ; max altitude (km), place where simulatin stops

xrange=[250,500] ; spectral range in wavenumbers (cm-1)
wn_step=0.1 ; spectral resolution (cm-1)
n_pionts=round((xrange[1]-xrange[0])/wn_step)
h2o_ac=dblarr(3,n_pionts)
h2o_ac[0,*]=reverse(10000.0/(indgen(n_pionts)*wn_step+xrange[0])) ;
array of wavenumber values (cm-1)

co2_ac=dblarr(3,n_pionts)
co2_ac[0,*]=h2o_ac[0,*]

h2o_total=0.d
co2_total=0.d
transmittance_h2o=1.d
transmittance_co2=1.d

while h le h_max do begin

    h2o_ac[2,*]=Mars_h2o_absorption_coefficient(reform(h2o_ac[0,*]),h) ;
    H2O absorption coefficient at given height (h), function takes in to
    account pressure and temperature of the Martian atmosphere and returns
    absorption coefficients where taken from HITRAN database (Rothman et al.
    2013)
    co2_ac[2,*]=Mars_co2_absorption_coefficient(reform(h2o_ac[0,*]),h) ;
    the same for CO2

    n_of_moles=martian_atmospheric_density(h)*1000.d / average_molar_mass *
    h_step * 1000.d / 10000.d ; n of moles of martian atmosphere malecules in
    the qube 1cm*1cm*h_step
    n_of_h2o_moles=martian_h2o_distrib(h)*n_of_moles/1e6 ; n of H2O moles
    in the qube 1cm*1cm*h_step
    n_of_co2_moles=n_of_moles*Carbon_dioxide_amount ; n of CO2 moles in
    the qube 1cm*1cm*h_step

```

```

        n_of_h2o_molecules=n_of_h2o_moles*Mole ; n of H2O molecules in the cube
1cm*1cm*h_step
        n_of_co2_molecules=n_of_co2_moles*Mole ; n of CO2 molecules in the cube
1cm*1cm*h_step
        h2o_total+=n_of_h2o_moles
        co2_total+=n_of_co2_moles
        absorption_h2o=((reform(h2o_ac[2,*])*n_of_h2o_molecules)) ; absorption
caused by a given number of H2O molecules
        absorption_co2=((reform(co2_ac[2,*])*n_of_co2_molecules)) ; absorption
caused by a given number of CO2 molecules
        curr_transmittance_h2o=exp(-absorption_h2o) ; transmittance through
current layer
        curr_transmittance_co2=exp(-absorption_co2) ; transmittance through
current layer
        transmittance_h2o=transmittance_h2o-transmittance_h2o*(1-
curr_transmittance_h2o) ; total transmittance at given height h
        transmittance_co2=transmittance_co2-transmittance_co2*(1-
curr_transmittance_co2) ; total transmittance at given height h
        print,h
        h+=h_step
    endwhile

;arrays transmittance_h2o and transmittance_co2 contain total Martian
atmospheric transmittance

end

```
