# Supplementary material for: Concept and Design of Martian Far-IR ORE Spectrometer (MIRORES)
Source: MDPI journal article supplement (doi:10.3390/rs14122799), 2022-06-10
Supplement: s1 [file s1]

|      |         |       |          |          |          |
|------|---------|-------|----------|----------|----------|
| Uc18 | U12b    | Uadc  | x76uV    | Uadc R15 | Uadc R28 |
| 0V   | -0.424V | 13254 | 1000,8mV | 1,78 V   | 0,74V    |

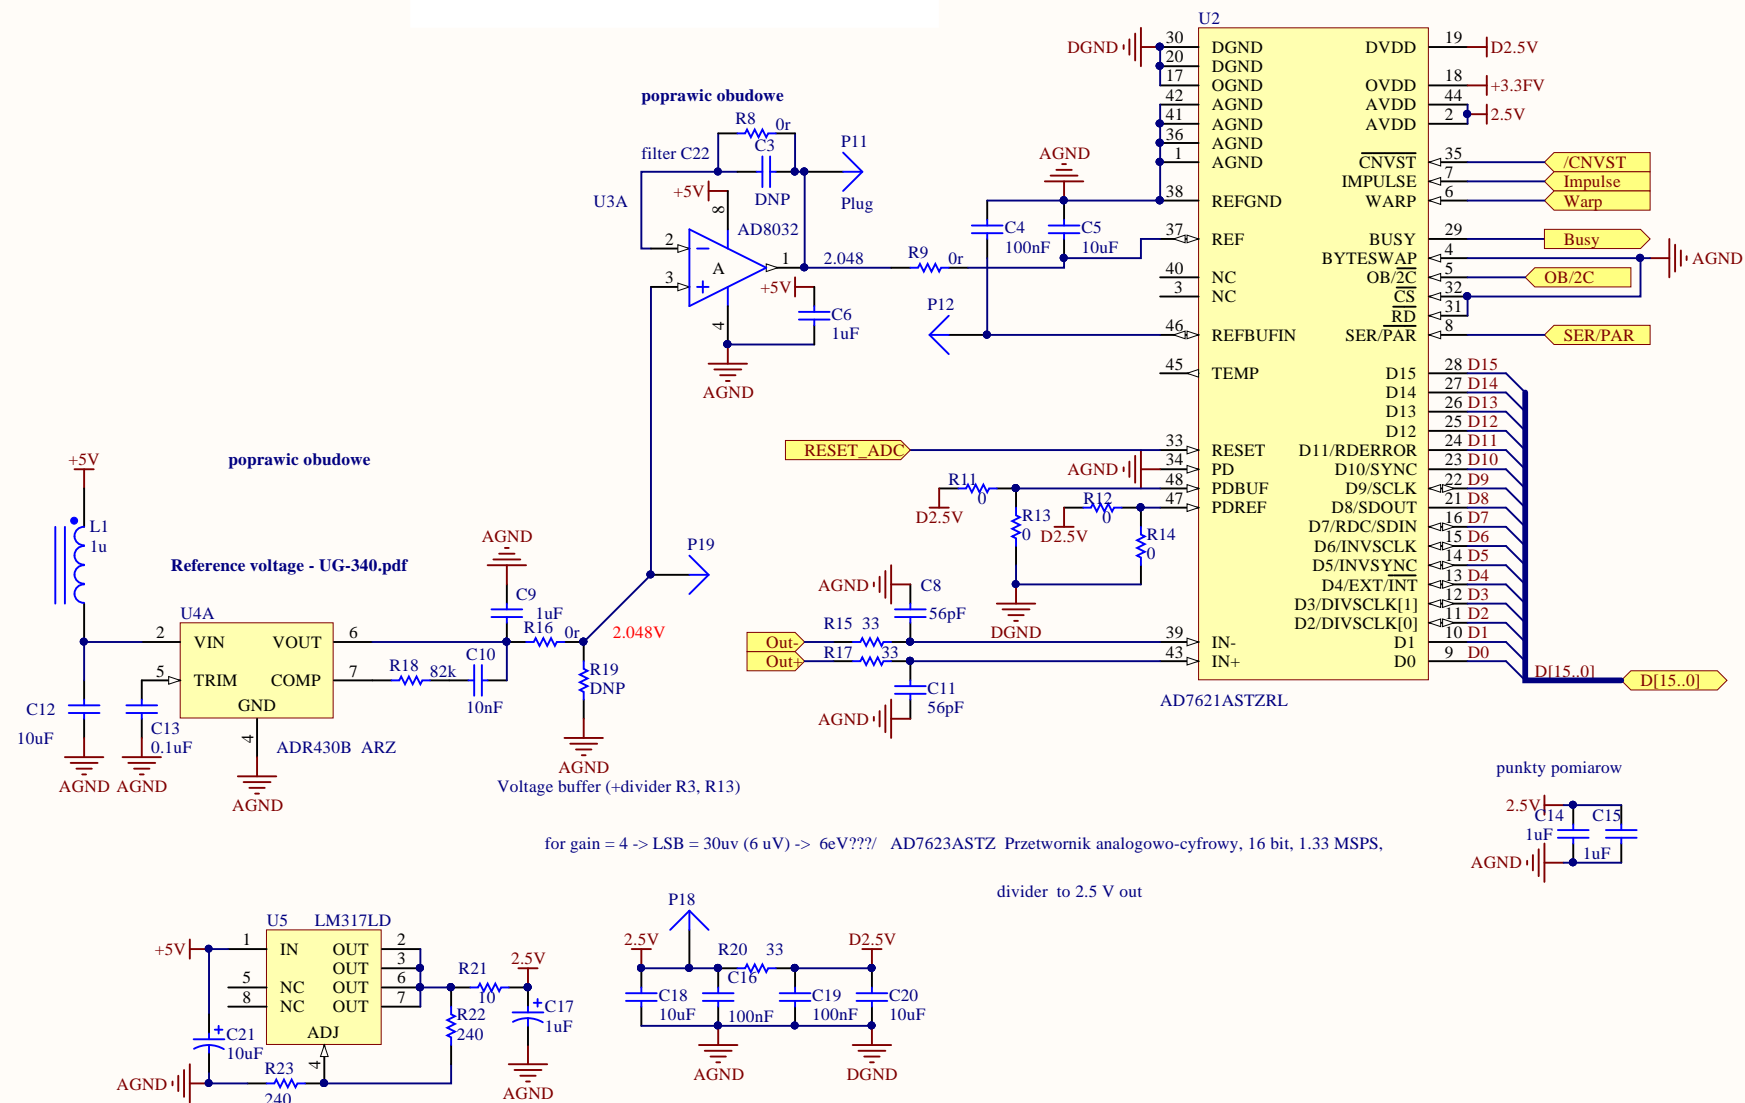

for gain = 4 -> LSB = 30uv (6 uV) -> 6eV???/ AD7623ASTZ Przetwornik analogowo-cyfrowy, 16 bit, 1.33 MSPS,

Project: \*

Module: Miroses ADC

Sheet: 3 of 4

File: Miroses\_ADC.SchDoc

Rev: 1.0

Drawn by: MK

Date: \*

Approved by: \*

Date: \*

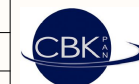

Space Research Centre  
Polish Academy of Sciences  
Solar Physics Division  
51-622 Wrocław, ul. Kopernika 11
